# Supplementary material
Source: PubMed Central journal article supplement (PMC2667045)
Supplement: 0810753106_0810753106SI.pdf [file 0810753106_0810753106SI.pdf]

# Supporting Information

Klasson et al. 10.1073/pnas.0810753106

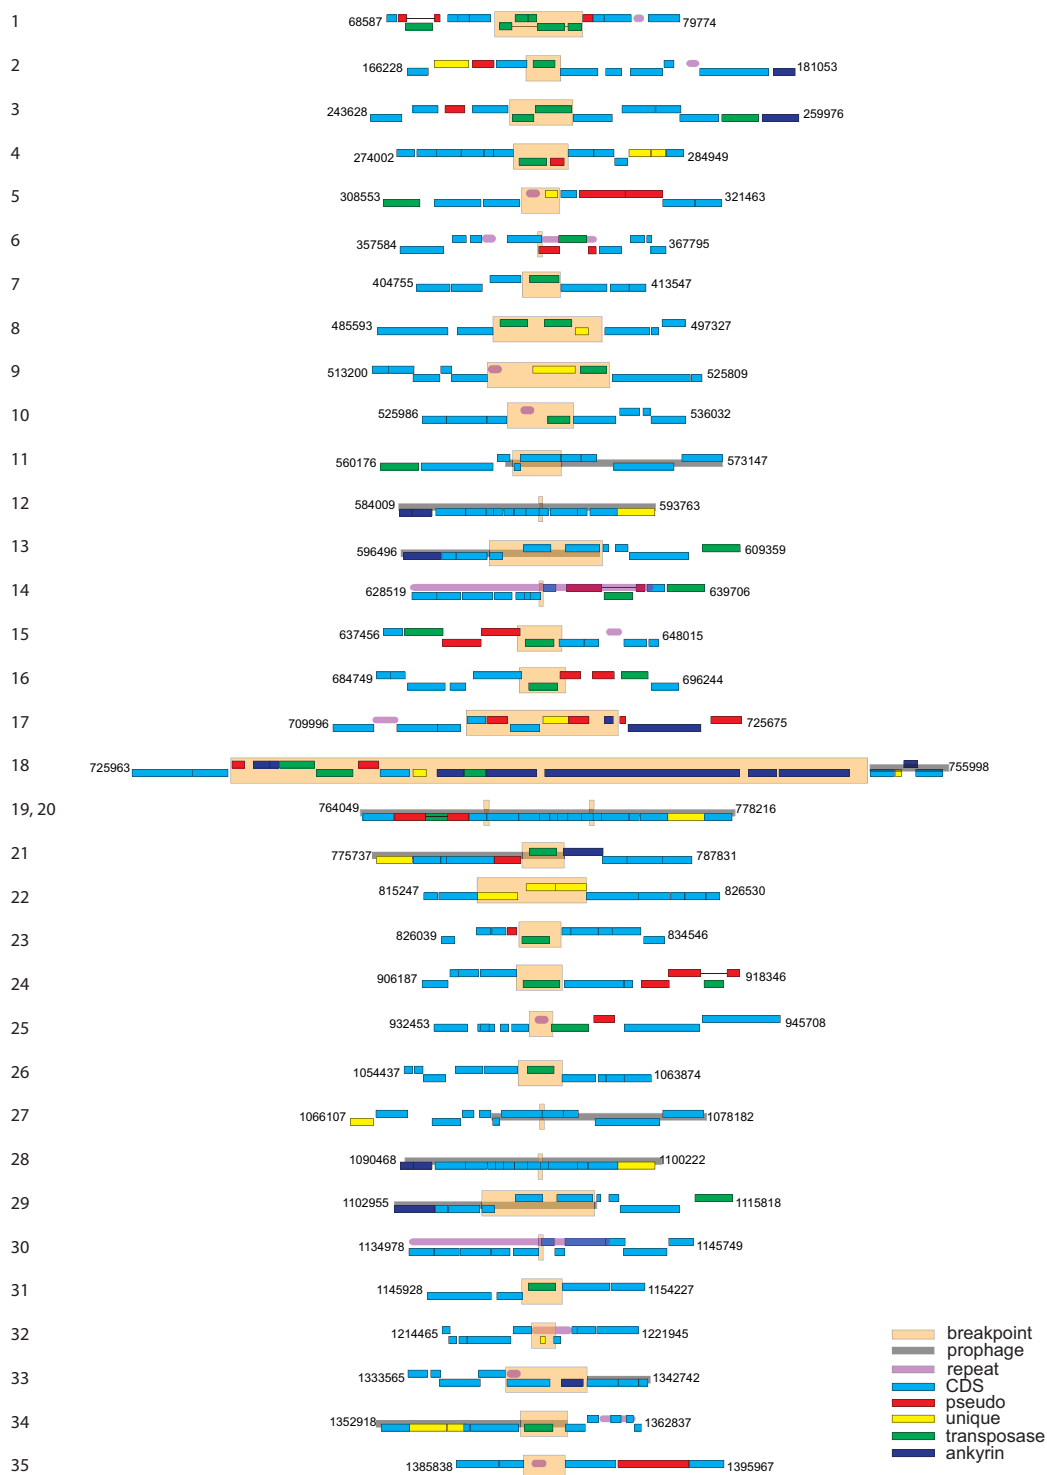

**Fig. S1.** Gene content at the 35 identified breakpoint positions (*light-orange boxed regions*) in the wRi genome where the gene order differs relative to the wMel genome. The numbers show the chromosomal position of the depicted region in the wRi genome.



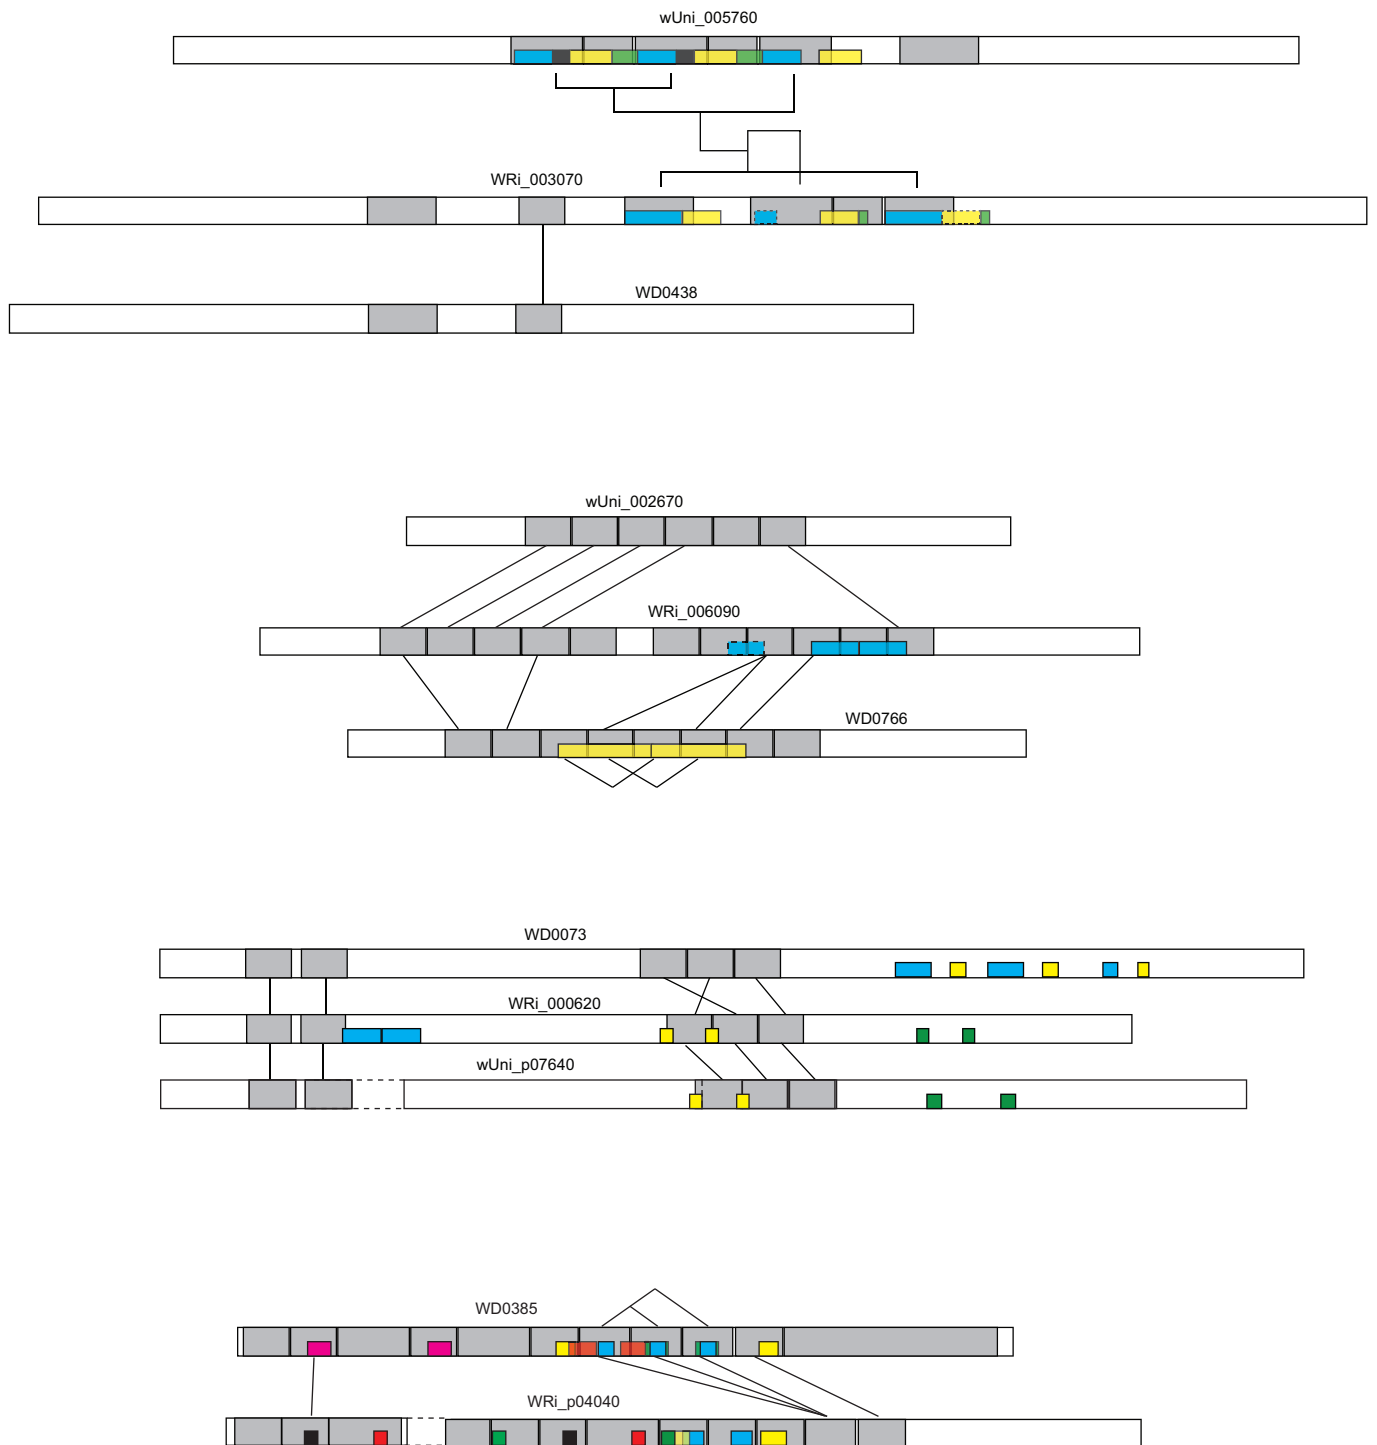

**Fig. S3.** Domain and repeat organization in 4 homologous ankyrin repeat genes in *wUni*, *wRi*, and *wMel*. The gray boxes show the ankyrin repeats found using *hmmsearch* with the PFAM *hmm* for ankyrin repeat and the black lines show relationships across ankyrin repeats where the posterior probability from the Bayesian phylogenetic analysis of the ANK domains (Fig. 4) is greater than 0.9. Colored boxes with solid lines represent identical repeats, and colored boxes with dashed lines represent repeats with identity higher than 90%. Each color represents a different repeat inside a particular gene and colors do not necessarily correspond to the same repeat in the homologous gene. The dashed lines between 2 different parts of a gene show the position of an IS-element insertion in the gene.



**Table S1. Features of ankyrin repeat containing genes identified in the *wRi* genome with highly similar positional homologs in the *wMel* genome**

| <i>wRi</i> |             |                   | <i>wMel</i> |             |                   | <i>wUni</i>              |             |                   | <i>wRi-wMel</i>      |                      | <i>wRi-wUni</i>      |                      | <i>wUni-wMel</i>     |                      |
|------------|-------------|-------------------|-------------|-------------|-------------------|--------------------------|-------------|-------------------|----------------------|----------------------|----------------------|----------------------|----------------------|----------------------|
| Gene       | Length (aa) | ANKs <sup>a</sup> | Gene        | Length (aa) | ANKs <sup>a</sup> | Gene                     | Length (aa) | ANKs <sup>a</sup> | <i>K<sub>a</sub></i> | <i>K<sub>s</sub></i> | <i>K<sub>a</sub></i> | <i>K<sub>s</sub></i> | <i>K<sub>a</sub></i> | <i>K<sub>s</sub></i> |
| WRi_000280 | 721         | 0–3               | WD00032/3/4 | 859         | 0–3               | WUni_p06070              | 622         | 0–3               | 0.013                | 0.027                | 0.048                | 0.103                | 0.004                | 0.015                |
| WRi_000290 | 288         | 6                 | WD0035      | 288         | 6                 | WUni_006060              | 288         | 6                 | 0.000                | 0.000                | 0.003                | 0.000                | 0.003                | 0.000                |
| WRi_001790 | 268         | 1                 | WD0191      | 268         | 1                 | WUni_004090 <sup>b</sup> | 214         | 1                 | 0.021                | 0.030                | 0.008                | 0.000                | 0.020                | 0.029                |
| WRi_002480 | 454         | 10–11             | WD0498/9    | 454         | 9                 | WUni_009360              | 454         | 10–11             | 0.000                | 0.005                | 0.006                | 0.031                | 0.006                | 0.037                |
| WRi_003040 | 400         | 1–2               | WD0441      | 402         | 1–2               | WUni_003380 <sup>b</sup> | 535         | 1–2               | 0.016                | 0.047                | 0.016                | 0.030                | 0.005                | 0.017                |
| WRi_005390 | 966         | 3–4               | WD0633      | 966         | 3–4               | -                        | -           | -                 | 0.006                | 0.006                | -                    | -                    | -                    | -                    |
| WRi_010050 |             |                   |             |             |                   |                          |             |                   |                      |                      |                      |                      |                      |                      |
| WRi_005440 | 152         | 3                 | WD0636      | 152         | 3                 | -                        | -           | -                 | 0.003                | 0.000                | -                    | -                    | -                    | -                    |
| WRi_010100 |             |                   |             |             |                   |                          |             |                   |                      |                      |                      |                      |                      |                      |
| WRi_005450 | 257         | 3                 | WD0637      | 208         | 3                 | -                        | -           | -                 | 0.002                | 0.006                | -                    | -                    | -                    | -                    |
| WRi_010110 |             |                   |             |             |                   |                          |             |                   |                      |                      |                      |                      |                      |                      |
| WRi_005620 | 493         | 9–10              | WD0596      | 493         | 9–10              | -                        | -           | -                 | 0.001                | 0.000                | -                    | -                    | -                    | -                    |
| WRi_010280 |             |                   |             |             |                   |                          |             |                   |                      |                      |                      |                      |                      |                      |

<sup>a</sup>Number of ANK domains found with Interproscan in searches against the PFAM and SMART databases. An interval is shown if the searches against the two databases yielded different results.

<sup>b</sup>Partial sequences, located at contig ends.

*K<sub>a</sub>*, Nonsynonymous substitutions per site; *K<sub>s</sub>*, Synonymous substitutions per site.

**Table S2. Features of ankyrin repeat containing genes identified in the *wRi* genome with highly divergent positional homologs in the *wMel* genome**

| <i>wRi</i>              |             |                   | <i>wMel</i> |             |                   | <i>wUni</i>              |             |                   | <i>wRi-wMel</i>      |                      | <i>wRi-wUni</i>      |                      | <i>wUni-wMel</i>     |                      |
|-------------------------|-------------|-------------------|-------------|-------------|-------------------|--------------------------|-------------|-------------------|----------------------|----------------------|----------------------|----------------------|----------------------|----------------------|
| Gene                    | Length (aa) | ANKs <sup>a</sup> | Gene        | Length (aa) | ANKs <sup>a</sup> | Gene                     | Length (aa) | ANKs <sup>a</sup> | <i>K<sub>a</sub></i> | <i>K<sub>s</sub></i> | <i>K<sub>a</sub></i> | <i>K<sub>s</sub></i> | <i>K<sub>a</sub></i> | <i>K<sub>s</sub></i> |
| WRi_000620              | 698         | 5–6               | WD0073      | 800         | 5–6               | WUni_p07640 <sup>b</sup> | 722         | 5–6               | 0.109                | 0.139                | 0.068                | 0.074                | 0.061                | 0.072                |
| WRi_001060              | 1094        | 10                | WD0147      | 954         | 11                | -                        | -           | -                 | 0.429                | 0.990                | -                    | -                    | -                    | -                    |
| WRi_003070              | 929         | 7–8               | WD0438      | 632         | 2                 | WUni_005760              | 787         | 6–7               | 0.280                | 0.752                | 0.296                | 0.843                | 0.389                | 1.134                |
| WRi_003100              | 237         | 0–2               | WD0434      | 251         | 0                 | -                        | -           | -                 | 0.291                | 0.630                | -                    | -                    | -                    | -                    |
| WRi_p03640 <sup>b</sup> | 371         | 6                 | WD0550      | 329         | 6                 | WUni_009500              | 309         | 5                 | 0.556                | 1.283                | 0.210                | 0.477                | 0.319                | 1.118                |
| WRi_p04040 <sup>b</sup> | 610         | 12                | WD0385      | 542         | 10–11             | WUni_004210              | 193         | 1                 | 0.172                | 0.167                | 0.106                | 0.109                | 0.327                | 0.475                |
| WRi_006090              | 615         | 11                | WD0766      | 474         | 8                 | WUni_002670              | 427         | 6                 | 0.071                | 0.122                | 0.028                | 0.024                | 0.125                | 0.112                |
| WRi_006690              | 926         | 2–3               | WD0633      | 966         | 3–4               | -                        | -           | -                 | 0.416                | 1.914                | -                    | -                    | -                    | -                    |
| WRi_006900              | 178         | 4                 | WD0566      | 173         | 2–3               | -                        | -           | -                 | 0.503                | 83.939               | -                    | -                    | -                    | -                    |
| WRi_p07220 <sup>b</sup> | 374         | 7                 | WD0596      | 493         | 9–10              | -                        | -           | -                 | 0.305                | 2.856                | -                    | -                    | -                    | -                    |
| WRi_007240              | 498         | 2–3               | WD0753/4    | 544         | 2–4               | WUni_p04990 <sup>b</sup> | 497         | 2–3               | 0.231                | 0.550                | 0.390                | 1.112                | 0.335                | 0.604                |
| WRi_p07650 <sup>b</sup> | 110         | 2                 | WD0596      | 493         | 9–10              | -                        | -           | -                 | 0.140                | 3.557                | -                    | -                    | -                    | -                    |

<sup>a</sup>Number of ANK domains found with Interproscan when searching against the PFAM and SMART databases. An interval is shown if the searches against PFAM and SMART yielded different results.

<sup>b</sup>Genes disrupted by IS-element insertions.

*K<sub>a</sub>*, Nonsynonymous substitutions per site; *K<sub>s</sub>*, Synonymous substitutions per site.

**Table S3. Features of ankyrin repeat containing genes uniquely identified in the *w*Ri genome without homologs in the *w*Mel genome**

| wRi                     |             |                   |
|-------------------------|-------------|-------------------|
| Gene                    | Length (aa) | ANKs <sup>a</sup> |
| WRi_002880              | 491         | 6–7               |
| WRi_p06670              | 95          | 2                 |
| WRi_006740              | 205         | 3                 |
| WRi_006750              | 110         | 1–2               |
| WRi_006810              | 336         | 3–4               |
| WRi_p06840 <sup>b</sup> | 617         | 16–17             |
| WRi_006850              | 2474        | 34                |
| WRi_006860              | 359         | 4                 |
| WRi_006870              | 866         | 21–22             |
| WRi_012460              | 270         | 5                 |

<sup>a</sup>Number of ANK domains found with Interproscan when searching against the PFAM and SMART databases. An interval is shown if the searches against PFAM and SMART yielded different results.

<sup>b</sup>Genes disrupted by IS-element insertions.

**Table S4. General features of the *w*Ri genome compared to *w*Mel**

|                       | <i>w</i> Ri | <i>w</i> Mel |
|-----------------------|-------------|--------------|
| Genome size (bp)      | 1,445,873   | 1,267,782    |
| CDSs                  | 1,150       | 1,196        |
| Pseudogenes           | 114         | 113          |
| tRNAs                 | 34          | 34           |
| rRNA                  | One of each | One of each  |
| GC %                  | 35.2        | 35.2         |
| Average length of CDS | 976         | 851          |
| Coding density %      | 77.7        | 80.3         |



**Table S5. IS-elements identified in the *wRi* genome**

| Name <sup>a</sup> | Family <sup>a</sup> | Group <sup>a</sup> | Color <sup>b</sup> |
|-------------------|---------------------|--------------------|--------------------|
| ISWpi1            | IS5                 | IS1031             | Light brown        |
| ISWpi2            | IS481               |                    | Green              |
| ISWpi3            | IS3                 | IS3                | Dark purple        |
| ISWpi4            | IS481               |                    | Purple             |
| ISWpi5            | ISNCY               | ISBst12            | Deep pink          |
| ISWpi6            | IS4                 | IS231              | Dark orange        |
| ISWpi7            | IS110               |                    | Light orange       |
| ISWpi8            | IS110               |                    | Light pink         |
| ISWpi9            | IS5                 | IS903              | Blue               |
| ISWpi10           | IS630               |                    | Yellow             |
| ISWpi11           | IS630               |                    | Black              |

<sup>a</sup>Names are given in accordance with the IS nomenclature rules as defined in the IS Finder database

<sup>b</sup>Color refers to the color-coding of the IS-elements in Fig. 1.

**Table S6. Genes uniquely present in the *w*Ri and *w*Mel genomes, respectively**

|              | <i>w</i> Ri <sup>a</sup> | <i>w</i> Mel <sup>a</sup> |
|--------------|--------------------------|---------------------------|
| Hypothetical | 31 (9)                   | 35 (19)                   |
| ANKs         | 9 (0)                    | 5 (2)                     |
| Prophage     | 7 (4)                    | 4 (2)                     |
| Other        | 8 (5)                    | 8 (7)                     |
| IS-element   | 5 (3)                    | 2 (1)                     |

<sup>a</sup>Genes present in multiple copies are only counted once. The number of genes present as pseudogenes in the other genome is shown in parenthesis. Unique pseudogenes are not included.

**Table S7. *Drosophila* lines used in the breakpoint PCR assay**

| Host                | Infection                       | Lines        | Year when line established |
|---------------------|---------------------------------|--------------|----------------------------|
| <i>D. simulans</i>  | Natural                         | KB28         | 1986 (1)                   |
| <i>D. simulans</i>  | Transinfected                   | KB55         | 1994 (2)                   |
| <i>D. simulans</i>  | Transinfected, Natural wNo, wHa | KB16, KB18   | 1997 (3)                   |
| <i>D. yakuba</i>    | Transinfected                   | KB82, KB83   | 1996 (4)                   |
| <i>D. teissieri</i> | Transinfected                   | KB114, KB115 | 1999 (4)                   |
| <i>D. santomea</i>  | Transinfected                   | KB127, KB128 | 2000 (4)                   |

1. Hoffmann AA, Turelli M, Simmons GM (1986) Unidirectional Incompatibility between Populations of *Drosophila simulans*. *Evolution* 40:692–701.
2. Giordano R, O'Neill SL, Robertson HM (1995) *Wolbachia* infections and the expression of cytoplasmic incompatibility in *Drosophila sechellia* and *D. mauritiana*. *Genetics* 140:1307–1317.
3. Rousset F, Braig HR, O'Neill SL (1999) A stable triple *Wolbachia* infection in *Drosophila* with nearly additive incompatibility effects. *Heredity* 82 ( Pt 6):620–627.
4. Zabalou S, et al. (2004) Natural *Wolbachia* infections in the *Drosophila yakuba* species complex do not induce cytoplasmic incompatibility but fully rescue the wRi modification. *Genetics* 167:827–834.

**Table S8. Median synonymous substitution-frequency per site (Ks), with strains and number of genes included detailed in Fig. 2**

| Strain or species                          | Median Ks |
|--------------------------------------------|-----------|
| <i>Wolbachia</i>                           |           |
| wMel-wUni                                  | 0.024     |
| wRi-wUni                                   | 0.035     |
| wRi-wMel                                   | 0.025     |
| <i>Rickettsia</i> *                        |           |
| Rc-Rm                                      | 0.039     |
| Rr-Rm                                      | 0.043     |
| Rr-Rc                                      | 0.023     |
| <i>Neisseria meningitidis</i>              |           |
| FAM18-MC58                                 | 0.056     |
| 053442-FAM18                               | 0.053     |
| 053442-MC58                                | 0.060     |
| <i>Staphylococcus aureus subsp. aureus</i> |           |
| MRSA252-COL                                | 0.047     |
| MRSA151-MSSA476                            | 0.048     |
| MSSA476-COL                                | 0.012     |

\*Species: Rc, *Rickettsia conorii*; Rm, *R. massilliae*; Rr, *R. rickettsii*.

**Table S9. Tissue and developmental stage-specific RNA expression of the ANK genes in *wRi***

| <i>wRi</i> gene         | <i>wMel</i> gene | ♂                | ♀                | T                | O                | 2 h                          | o/n                          |
|-------------------------|------------------|------------------|------------------|------------------|------------------|------------------------------|------------------------------|
| WRi_000280              | WD0032/3/4       |                  |                  |                  | Not tested       |                              |                              |
| WRi_000290              | WD0035           | n <sup>+</sup>               | n <sup>+</sup>               |
| WRi_001790              | WD0191           | n <sup>+</sup>   | n <sup>+</sup>   | n <sup>+</sup>   | w <sup>+</sup>   | n <sup>+</sup>               | n <sup>+</sup>               |
| WRi_002480              | WD0498           | +                | +                | +                | +                | w <sup>+</sup>               | +                            |
| WRi_003040              | WD0441           | +                | +                | +                | +                | +                            | +                            |
| WRi_005390              | WD0633           | +                | +                | +                | +                | +                            | +                            |
| WRi_010050              |                  |                  |                  |                  |                  |                              |                              |
| WRi_005440              | WD0636           | n <sup>+</sup>               | n <sup>+</sup>               |
| WRi_010100              |                  |                  |                  |                  |                  |                              |                              |
| WRi_005620              | WD0596           | n <sup>+</sup>   | n <sup>+</sup>   | n <sup>+</sup>   | +                | n <sup>+</sup>               | n <sup>+</sup>               |
| WRi_010280              |                  |                  |                  |                  |                  |                              |                              |
| WRi_000620              | WD0073           | n <sup>+</sup>               | n <sup>+</sup>               |
| WRi_001060              | WD0147           | +                | +                | +                | +                | +                            | +                            |
| WRi_003070              | WD0438           | n <sup>-</sup>   | n <sup>+</sup>   | n <sup>-</sup>   | n <sup>+</sup>   | n <sup>+</sup>               | n <sup>+</sup>               |
| WRi_003100              | WD0434           |                  |                  |                  | Not tested       |                              |                              |
| WRi_p03640              | WD0550           | +                | +                | +                | +                | +                            | +                            |
| WRi_p04040 <sup>a</sup> | WD0385           | n <sup>-/+</sup> | n <sup>-/+</sup> | n <sup>+/+</sup> | n <sup>+/+</sup> | n <sup>+/n<sup>+</sup></sup> | n <sup>+/n<sup>+</sup></sup> |
| WRi_006090              | WD0766           | +                | +                | +                | +                | +                            | +                            |
| WRi_006690              | WD0633           | +                | +                | +                | +                | +                            | +                            |
| WRi_006900              | WD0566           | +                | +                | +                | +                | +                            | +                            |
| WRi_p07220              | WD0596           | +                | +                | +                | +                | +                            | +                            |
| WRi_007240              | WD0754           | +                | +                | +                | +                | +                            | +                            |
| WRi_p07650              | WD0596           | +                | +                | +                | +                | +                            | n <sup>-</sup>               |
| WRi_002880              | Absent           | +                | +                | +                | +                | +                            | +                            |
| WRi_p06670              | Absent           |                  |                  |                  | Not tested       |                              |                              |
| WRi_006740              | Absent           | +                | +                | w <sup>+</sup>   | +                | +                            | w <sup>+</sup>               |
| WRi_006750              | Absent           | +                | +                | +                | +                | +                            | +                            |
| WRi_006810              | Absent           | +                | +                | w <sup>+</sup>   | +                | n <sup>-</sup>               | +                            |
| WRi_p06840              | Absent           | +                | +                | +                | +                | +                            | +                            |
| WRi_006850              | Absent           | +                | +                | +                | +                | w <sup>+</sup>               | +                            |
| WRi_006860              | Absent           | +                | +                | +                | +                | +                            | +                            |
| WRi_006870              | Absent           | +                | +                | w <sup>+</sup>   | +                | n <sup>-</sup>               | n <sup>-</sup>               |
| WRi_012460              | Absent           | n <sup>-</sup>               | n <sup>-</sup>               |

Absent, absence of a homologous gene in *wMel*; +, positive using conventional RT-PCR; w<sup>+</sup>, weakly positive using conventional RT-PCR; n<sup>+</sup>, positive using nested RT-PCR; n<sup>-</sup>, negative using both conventional and nested RT-PCR. ♂, male adult; ♀, female adult; T, testis; O, ovaries; 2 h, early embryos 2 h; o/n, late embryos overnight.

<sup>a</sup>WRi\_p04040 has an IS-insertion. The two PCR results represent the 5' and 3' part of the gene respectively, not spanning the IS-insertion.

**Table S10. Tissue and developmental stage-specific RNA expression of ANK genes in the B-group strains *wNo*, *wMau*, and *wMa***

| Genes      | <i>wNo</i>     |                |                |                |                |                | <i>wMau</i>    |                |                |                |                |                | <i>wMa</i>     |                |                |                |                |                |
|------------|----------------|----------------|----------------|----------------|----------------|----------------|----------------|----------------|----------------|----------------|----------------|----------------|----------------|----------------|----------------|----------------|----------------|----------------|
|            | ♂              | ♀              | T              | O              | 2 h            | o/n            | ♂              | ♀              | T              | O              | 2 h            | o/n            | ♂              | ♀              | T              | O              | 2 h            | o/n            |
| WRI_006870 | n <sup>+</sup> | n <sup>+</sup> | n <sup>-</sup> | n <sup>+</sup> | n <sup>-</sup> | n <sup>+</sup> | n <sup>-</sup> | n <sup>+</sup> | n <sup>-</sup> | n <sup>-</sup> | n <sup>+</sup> | n <sup>+</sup> | n <sup>+</sup> | n <sup>+</sup> |
| WRI_006900 | +              | +              | +              | +              | n <sup>+</sup> | n <sup>-</sup> | +              | +              | +              | +              | +              | +              | +              | +              | +              | +              | n <sup>+</sup> | +              |

Absent, absence of a homologous gene in *wMel*; +, positive using conventional RT-PCR; w<sup>+</sup>, weakly positive using conventional RT-PCR; n<sup>+</sup>, positive using nested RT-PCR; n<sup>-</sup>, negative using both conventional and nested RT-PCR. ♂, male adult; ♀, female adult; T, testis; O, ovaries; 2 h, early embryos 2 h; o/n, late embryos overnight.
